# Supplementary material
Source: PubMed Central journal article supplement (PMC2749119)
Supplement: supp_M109.025791_jbc.M109.025791-1.pdf [file supp_M109.025791_jbc.M109.025791-1.pdf]

## SUPPLEMENTAL DATA

### **Supplemental FIGURE 1. DNA and RNA binding activity of AtCSP3.**

**A,** Purification of recombinant proteins expressed in *E.coli*. *E. coli* BL21 cells were transformed with pGEX-AtCSP3 and the recombinant protein was purified. Lane 1; soluble fraction from non-induced cells. Lane 2; soluble fraction from IPTG-induced cells. Lane 3; purified protein using GST-sepharose column chromatography and PreScission protease. **B,** Analysis of ssDNA and dsDNA binding activities of AtCSP3 by gel shift assay. Purified recombinant protein (from 0 to 500 pmol) was incubated with M13mp8 ssDNA or dsDNA and separated by agarose-gel electrophoresis. GST (500 pmol) was used as a negative control. **C,** RNA-binding activity of AtCSP3. Purified recombinant protein (from 0 to 250 pmol) was incubated with *in vitro*-transcribed luciferase mRNA and separated by agarose gel electrophoresis. The purified GST protein (B, 500 pmol; C, 250 pmol) was used as a negative control.

### **Supplemental FIGURE 2. Tissue- and developmental stage-specific expression and subcellular localization of AtCSP3.**

Bent cotyledon stage embryo (A), one-day-old germinating seed (B), two-day-old seedling (C), four-day-old seedling (D), root tip of four-day-old seedling (E), immature silique (F), flower (G and H), anther (I), pistil (J), three-week-old whole plant (I), and root (J). K, Localization of *pAtCSP3::AtCSP3::GFP* during cold treatment. Ten-day-old transgenic seedlings exposed to 4°C for 1 and 3 days (Scale bars, 20 μm).

### **Supplemental FIGURE 3. Complementation of the freezing sensitive phenotype of *atcsp3-2* mutant.**

Two independent lines of *atcsp3-2* transformed with *pAtCSP3::AtCSP3* were analyzed for freezing tolerance. Survival rates in WT, *atcsp3-*

2 mutant, and *atcsp3-2/pAtCSP3::AtCSP3* plants (lines #38 and #41) were scored at 7 days after freezing treatment at -4°C (NA; non-acclimation).

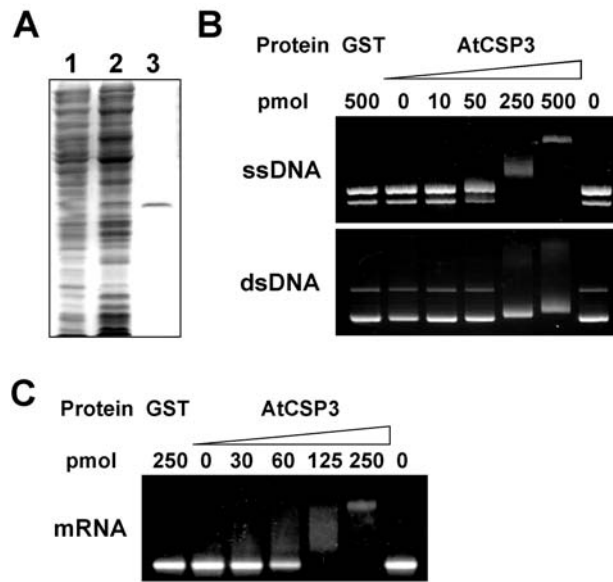

Kim et al. Supplemental FIGURE 1.

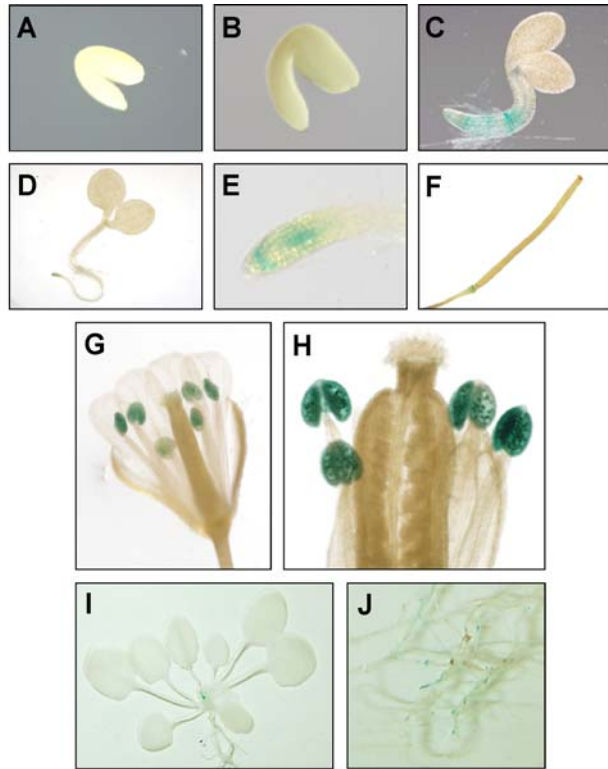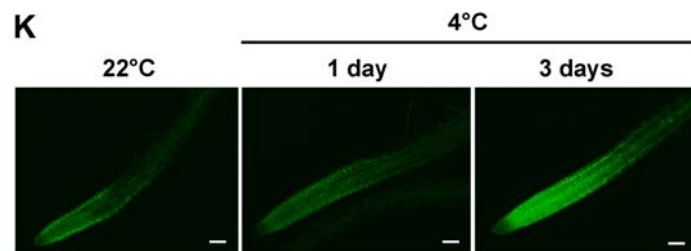

Kim et al. Supplemental FIGURE 2.

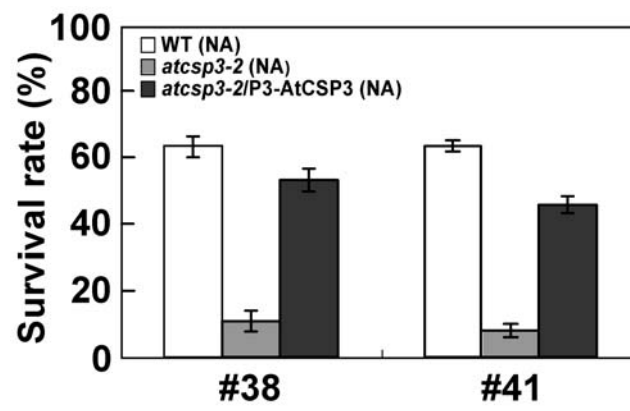

Kim et al. Supplemental FIGURE 3.

Table S1. Genes down-regulated in *atcsp3-2* mutant.

| AGI code  | Gene description                                                        | Average fold | *Abiotic stresses |
|-----------|-------------------------------------------------------------------------|--------------|-------------------|
| At2g17870 | cold-shock DNA-binding family protein                                   | 12.2         | -                 |
| At5g48430 | unknown protein                                                         | 7.71         | S                 |
| At5g39580 | peroxidase, putative (Aterox P62) (ATP24a)                              | 5.47         | C, S, O           |
| At3g60140 | glycosyl hydrolase family 1 protein                                     | 5.32         | D, S, O           |
| At1g08090 | high affinity nitrate transporter 2.1 (ATNRT2:1, ACH1)                  | 5.1          | C                 |
| At1g02920 | glutathione S-transferase 11(ATGSTF7)                                   | 5.02         | C, D, S, O        |
| At1g10070 | branched-chain amino acid transaminase 2 (ATBCAT2)                      | 4.75         | S, O              |
| At1g30730 | FAD-binding domain-containing protein                                   | 4.63         | C, D, O           |
| At5g57220 | cytochrome P450 (CYP81F2)                                               | 4.55         | C, D, S, O        |
| At1g02930 | glutathione S-transferase, early responsive to dehydration 11 (ATGSTF6) | 4.42         | C, D, S, O        |
| At5g40590 | DC1 domain-containing protein                                           | 3.7          | C, D, S           |
| At3g47340 | glutamine-dependent asparagine synthetase 1 (ASN1)                      | 3.62         | C, D, S, O        |
| At4g21680 | proton-dependent oligopeptide transport (POT) family protein            | 3.58         | S, O              |
| At5g64120 | peroxidase, putative (Aterox P71) (ATP15a)                              | 3.42         | C, D, S, O        |
| At5g57560 | xyloglucan:xyloglucosyl transferase (TCH4)                              | 3.04         | C, D, S, O        |
| At2g18690 | expressed protein                                                       | 2.81         | C, D, S, O        |
| At1g49570 | peroxidase, putative (Aterox P10) (ATP5a)                               | 2.8          | D, O              |
| At2g34930 | disease resistance family protein                                       | 2.66         | C, D, S, O        |
| At4g31800 | WRKY DNA-binding protein 18 (WRKY18)                                    | 2.64         | C, D, S, O        |
| At1g10550 | xyloglucan:xyloglucosyl transferase 33 (XTH33)                          | 2.63         | -                 |
| At1g19020 | expressed protein                                                       | 2.57         | C, D, S, O        |

Expression ratios (Col-0 plants/*atcsp3-2* mutant plants) > 2.5-fold. Values represent the mean of two replications.

\*Abiotic stress response data were obtained from eFP Browser (>3-fold). C, cold; D, drought; S, salt; O, osmotic stress.

Table S2. Primers used for this study.

| Gene name                           | Forward primer                    | Reverse primer                  |
|-------------------------------------|-----------------------------------|---------------------------------|
| Cloning                             |                                   |                                 |
| pGEX-AtCSP3                         | 5'-TCTGTCGACATGAGCGGAGAC-3'       | 5'-TGCAGCGGCCGCTTAAGCAAC-3'     |
| pINIII-AtCSP3                       | 5'-TCTCATATGATGAGCGGAGAC-3'       | 5'-GCATCGGATCCTTAAGCAAC-3'      |
| AtCSP3 promoter-GUS                 | 5'-ATTCTACTGCA GTTGGGTAAAAGT-3'   | 5'-TCTTCCGGATCCATTAGATCAGAG-3'  |
| AtCSP3 promoter::AtCSP3-GFP         | 5'-CACC CAACTAGGTATGCATGCATGGG-3' | 5'-TTAAGCAACCGAAGTACATTCCCTC-3' |
| Overexpression of AtCSP3            | 5'-TCTAGACGAACAAAGTGCTTCG-3'      | 5'-GAGCTCTTAAGCAACCGAAGTA-3'    |
| Probes                              |                                   |                                 |
| AtCSP3 transgene                    | 5'-TCTAGACGAACAAAGTGCTTCG-3'      | 5'-GAGCTCTTAAGCAACCGAAGTA-3'    |
| AtCSP3 specific gene                | 5'-GTTGATGCCATAAGTTTGAGATCTT-3'   | 5'-AACAGCAATGCAGAGTATAAGTAAA-3' |
| Screening of <i>atcsp3-2</i> mutant |                                   |                                 |
| T-DNA specific primer               | 5'-CGTCCGCAATGTGTTATTAAG-3'       | 5'-TACAATCCCTAGCGAAATGTC-3'     |
| AtCSP3 gene specific primer         | 5'-TGTACGAACAAAGTGCTTCGA-3'       | 5'-TACAATCCCTAGCGAAATGTC-3'     |
| RT-PCR                              |                                   |                                 |
| AtCSP1 (At4g36020)                  | 5'-ACGCCTAAGGATTTCCCA-3'          | 5'-ACACACAAAAGGACCAG-3'         |
| AtCSP2 (At4g38680)                  | 5'-CCAATCAAATGAGCGGAG-3'          | 5'-AGAACCGATCACTTGTGAG-3'       |
| AtCSP3 (At2g17870)                  | 5'-AAGTGCTTCGAGTTTTTGTTA-3'       | 5'-GCAGTGAACAGGTTGCAT-3'        |
| AtCSP4 (At2g21060)                  | 5'-AGAGAGATCTGATCGGTG-3'          | 5'-GAGAAGAGGGATCGATGA-3'        |
| Peroxidase (At5g39580)              | 5'-ATGGGCTTGGTCCGATCATT-3'        | 5'-TTAATCACTGATTAATTAACCGC-3'   |
| NRT2.1 (At1g08090)                  | 5'-GACAAGACGGCCAAGTTC-3'          | 5'-CCGTAGAGAAGAACGAAGAT-3'      |
| CYP81 (At5g57220)                   | 5'-ATGGATTACGTTTTGATTGTTT-3'      | 5'-TTAAGCCAAGAGATTAGTCAT-3'     |
| GSTF6 (At1g02930)                   | 5'-CAAGAGCAATTACTCAATACA-3'       | 5'-GAGATTCACTTAAAGAACCTT-3'     |
| DC1 (At5g40590)                     | 5'-ATGTCTTACGACAATCGGT-3'         | 5'-TTAGATGCAATTGAGAGCTGC-3'     |
| WRKY18 (At4g31800)                  | 5'-GATAAAGGTTTCTTTTATGGAC-3'      | 5'-TCATGTTCTAGATTGCTCCAT-3'     |
